# Supplementary material
Source: PubMed Central journal article supplement (PMC3341496)
Supplement: NIHMS370435-supplement-1_si_001.pdf [file NIHMS370435-supplement-1_si_001.pdf]

1 **Supporting Information**

2  
3 **Aptamer-enabled Efficient Isolation of Cancer Cells from**  
4 **Whole Blood Using a Microfluidic Device**

5  
6 Weian Sheng,<sup>1</sup> Tao Chen,<sup>2</sup> Rahul Kamath,<sup>3</sup> Xiangling Xiong,<sup>2</sup>

7 Weihong Tan,<sup>2\*</sup> Z. Hugh Fan<sup>1,3\*</sup>

8  
9 <sup>1</sup>Department of Mechanical and Aerospace Engineering, University of Florida,

10 P.O. Box 116250, Gainesville, FL, 32611, USA

11 <sup>2</sup>Department of Chemistry, University of Florida,

12 P.O. Box 117200, Gainesville, FL 32611, USA

13 <sup>3</sup>J. Crayton Pruitt Family Department of Biomedical Engineering, University of Florida,

14 P.O. Box 116131, Gainesville, FL 32611, USA

15  
16  
17  
18  
  
\*Authors to whom correspondence should be addressed. Fax: 1-352-392-7303; phone: 1-352-846-3021; e-mail: hfan@ufl.edu (Z.H.F). E-mail:tan@chem.ufl.edu (W.T)

## 1 **Aptamer Immobilization**

2 To demonstrate the immobilization of DNA aptamers onto the surface of a microchannel,  
3 biotinylated aptamers labeled with fluorescein isothiocyanate (FITC) was introduced into  
4 the channel and confocal microscope images were taken to measure the fluorescence  
5 intensity on the surface. As shown in **Figure S1**, the fluorescence signal increased with  
6 the increasing FITC-aptamer concentration (after thorough washing), proving that  
7 aptamers were successfully immobilized on the avidin-modified surfaces and the amount  
8 of aptamers immobilized is dependent on the aptamer concentration.

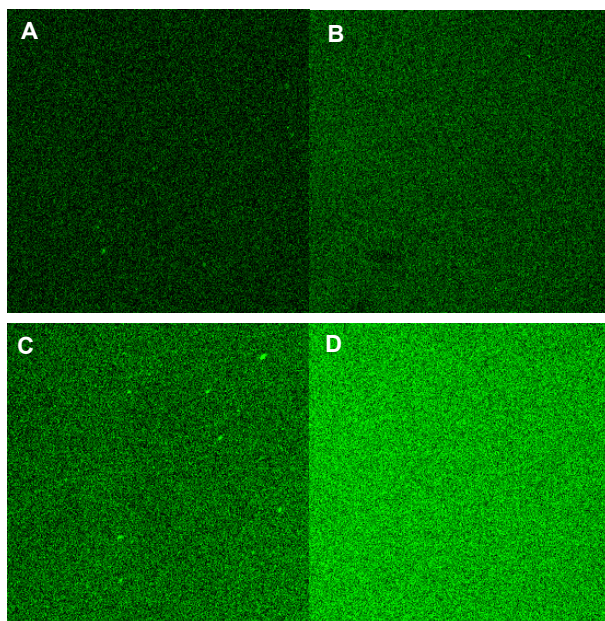

9  
10 **Figure S1.** Confocal fluorescence images of FITC-modified aptamers immobilized on  
11 the surfaces of a microfluidic channel. 1 mg/mL of avidin was introduced into the  
12 channel and incubated for 1 min, followed by three times of washing using the binding  
13 buffer. FITC-labeled sgc8-poly(T)-biotin aptamers were then introduced into the channel,  
14 incubated for 1 min, and washed three times with the binding buffer. The concentrations  
15 of aptamers are: **(A)** 2.5  $\mu$ M, **(B)** 25 $\mu$ M, **(C)** 50  $\mu$ M, and **(D)** 100  $\mu$ M.

## 1 Flow Cytometry

2 To ascertain if a poly(T)-modified aptamer preserves its binding affinity and specificity  
3 to its target cells, flow cytometry analysis was carried out. **Figure S2A** shows the  
4 histogram of CEM cells from the flow cytometer. Compared to cells only, a large shift in  
5 the fluorescence signal was observed for those cells conjugated with sgc8 aptamers. The  
6 result suggests that poly(T)-appended sgc8 aptamers still have specific binding with  
7 CEM cells. A random single strand DNA library or TD05 aptamer had non-specific  
8 binding with CEM cells, showing a tiny shift in the fluorescence signal compared to cells  
9 only. Similarly, **Figure S2B** shows that poly(T)-modified TD05 aptamers bound  
10 selectively with Ramos cells while sgc8 aptamer or a DNA library did not have specific  
11 binding. **Figure S2C** shows that the comparison of the flow cytometry between the cell-  
12 aptamer binding in the binding buffer and that in the capturing buffer. As detailed in the  
13 Experimental Section, the capturing buffer was prepared by adding Histopaque-1119 to  
14 the binding buffer for matching the density of blood. The flow cytometry results  
15 indicate that the addition of Histopaque-1119 to the binding buffer did not have any  
16 adverse effect on the binding of sgc8 aptamer with CEM cells.

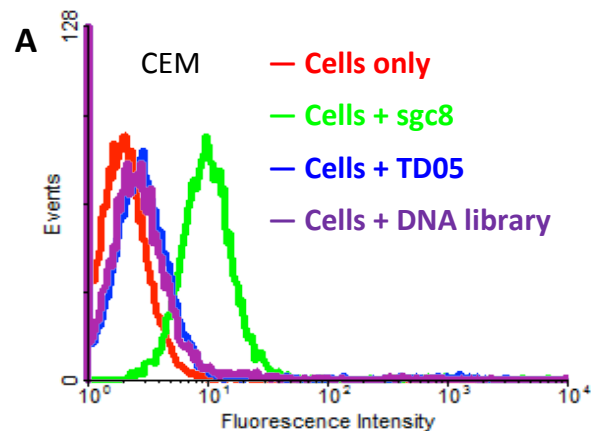

17

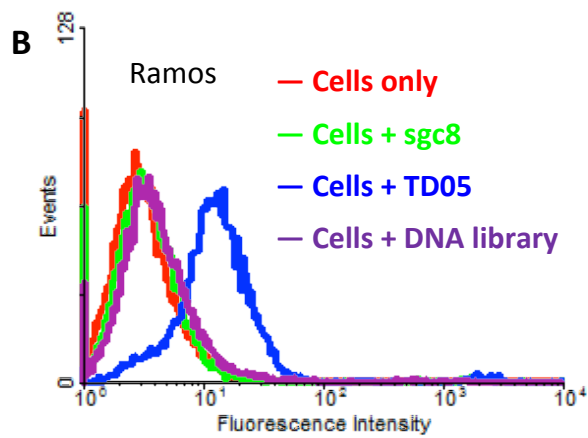

1

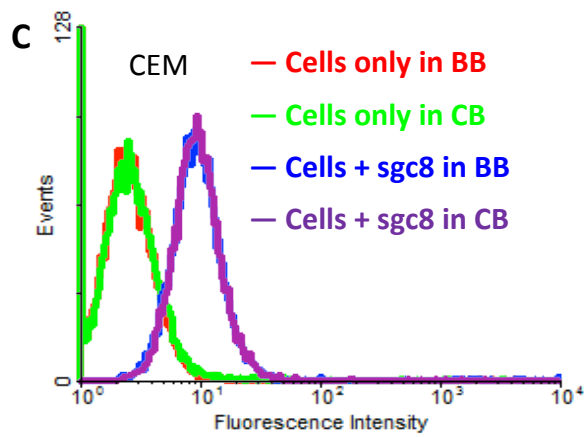

2

3 **Figure S2.** Flow cytometry histograms showing the selective binding of target cells with  
 4 corresponding aptamers. **(A)** CEM cells selectively bind with sgc8 aptamers. **(B)** Ramos  
 5 cells selectively bind with TD05 aptamers. **(C)** Comparison of cell-aptamer binding in  
 6 the binding buffer (BB) and in the capturing buffer (CB).

7
